# Supplementary material
Source: publisher site journal article supplement (https://www.dovepress.com/get_supplementary_file.php?f=237898.xlsx)
Supplement: Supplementary file 1 [file get_supplementary_file.php]

## Sheet: Tabela
Table 1. The sequence of primers used in the experiment for detection of specific transcripts with RT-qPCR.
Gene name	Gene abbreviation	Primer	Sequence 5'-3'	Amplicon lenght [bp]	Annealing temperature [⁰C]	Accesion no.
Osteopontin	Opn	F:	AGACCATGCAGAGAGCGAG	340	57.3	NM_001204203.1
		R:	GCCCTTTCCGTTGTTGTCCT
Osteocalcin	Ocl	F:	GGTGCAGACCTAGCAGACACCA	100	57	NM_001032298.3
		R:	CGCTGGGCTTGGCATCTGTAA
Collagen type I	Coll1	F:	CAGGGTATTGCTGGACAACGTG	107	61.4	NM_007742.4
		R:	GGACCTTGTTTGCCAGGTTCA
Runt related transcription factor 2	Runx-2	F:	TCCGAAATGCCTCCGCTGTT	130	58.8	NM_001146038.2
		R:	GCCACTTGGGGAGGATTTGT
B cell leukemia/lymphoma 2	Bcl-2	F:	GGATCCAGGATAACGGAGGC	141	58.8	NM_009741.5
		R:	ATGCACCCAGAGTGATGCAG
BCL2-associated X protein	Bax	F:	AGGACGCATCCACCAAGAAGC	251	58.8	XM_011250780.3
		R:	GGTTCTGATCAGCTCGGGCA
Transformation related protein 53	p53	F:	AGTCACAGCACATGACGGAGG	287	61.2	NM_011640.3
		R:	GGAGTCTTCCAGTGTGATGATGG
Cyclin-dependent kinase inhibitor 1A	p21	F:	ACTACCAGCTGTGGGGTGAG	126	59.8	NM_001111099.2
		R:	TCGGACATCACCAGGATTGG
Glyceraldehyde-3-phosphate dehydrogenase	Gapdh	F:	TGCACCACCAACTGCTTAG	177	58.8	XM_017321385.1
		R:	GGATGCAGGGATGATGTTC
mmu-miR-7a-5p	miR-7	F:	TGGAAGACTAGTGATTTTGTTGT	*	58.8	MIMAT0000677
mmu-mir-21-5p	miR-21	F:	TAGCTTATCAGACTGATGTTGA	*	58.8	MI0000569
mmu-miR-223-3p	miR-223	F:	TGTCAGTTTGTCAAATACCCCA	*	58.8	MIMAT0000665
* Due to poly (A) sequence it is not possible to predict the actual product size.
